# Supplementary material for: Mycelium-mediated transfer of water and nutrients stimulates bacterial activity in dry and oligotrophic environments
Source: PubMed Central journal article supplement (PMC5467244; doi:10.1038/ncomms15472), 2017-06-07
Supplement: ncomms15472-s1.pdf [file ncomms15472-s1.pdf]

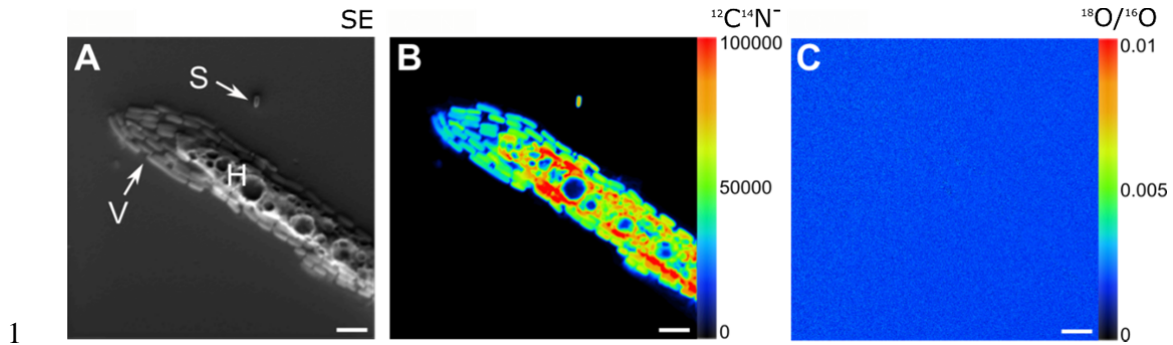

2 Supplementary Figure 1: NanoSIMS images of *P. ultimum* hyphae (H), *B. subtilis* spores (S)  
 3 and vegetative cells (V) identified in a secondary electron and total biomass ( $^{12}\text{C}^{14}\text{N}^-$ ) image  
 4 (A, B) of a non-labeled sample. The ratio images of  $^{18}\text{O}/^{16}\text{O}$  show the natural abundance of  
 5  $^{18}\text{O}$  in the biomass of *P. ultimum* and *B. subtilis* (C). The color scale indicates the intensities  
 6 of  $^{12}\text{C}^{14}\text{N}^-$  (B) and enrichment in  $^{18}\text{O}$  (C) with warmer colors representing higher secondary  
 7 ion counts and cooler colors representing lower values. Images represent a field of analysis  
 8 corresponding to a sample area of  $40\times 40\ \mu\text{m}$ . Scale bars,  $4\ \mu\text{m}$ .

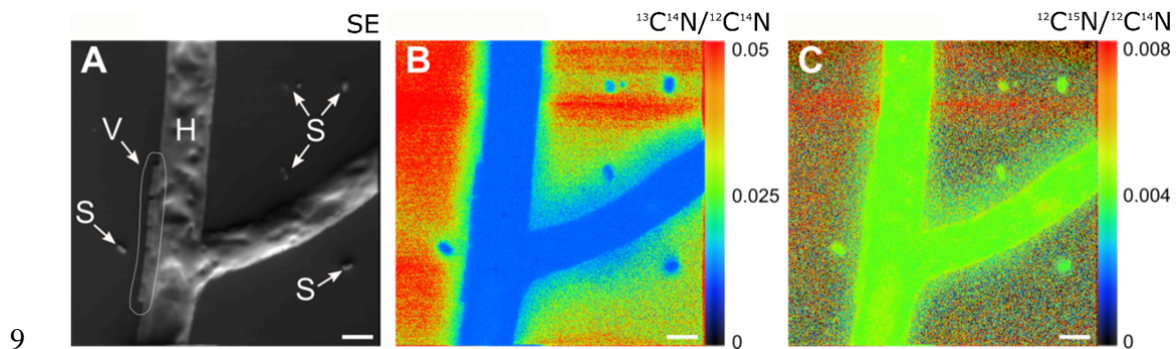

10 Supplementary Figure 2: NanoSIMS images of *P. ultimum* hyphae (H), *B. subtilis* spores (S)  
 11 and vegetative cells (V) identified in a secondary electron image (A) of a non-labeled sample.  
 12 The ratio images of  $^{13}\text{C}^{14}\text{N}/^{12}\text{C}^{14}\text{N}$  (B) and  $^{12}\text{C}^{15}\text{N}/^{12}\text{C}^{14}\text{N}$  (C) show the natural abundance of  
 13  $^{13}\text{C}$  and  $^{15}\text{N}$  in the biomass of *P. ultimum* and *B. subtilis*. The color scale indicates the  
 14 intensities of  $^{13}\text{C}^{14}\text{N}/^{12}\text{C}^{14}\text{N}$  (B) and  $^{12}\text{C}^{15}\text{N}/^{12}\text{C}^{14}\text{N}$  (C) enrichments with warmer colors  
 15 representing higher enrichment levels and cooler colors representing lower values. Images  
 16 represent a field of analysis corresponding to a sample area of  $40\times 40\ \mu\text{m}$ . Scale bars,  $4\ \mu\text{m}$ .

17 Supplementary Table 1: Number (#) of individual fields and replicate wafers analysed with  
18 NanoSIMS in  $^{18}\text{O}$  and  $^{13}\text{C}^{15}\text{N}$  labeling experiments and  $^{16}\text{O}$  and  $^{12}\text{C}^{14}\text{N}$  control experiments as  
19 well as numbers of vegetative cells and spores used to calculate APE shown in Fig. 6.

| <b>Sample</b>                | <b># Fields</b> | <b># Wafers</b> | <b># Vegetative cells</b> | <b># Spores</b> |
|------------------------------|-----------------|-----------------|---------------------------|-----------------|
| $^{18}\text{O}$              | 3               | 2               | 20                        | 23              |
| $^{16}\text{O}$              | 2               | 2               | 106                       | 3               |
| $^{13}\text{C}^{15}\text{N}$ | 2               | 1               | 57                        | 11              |
| $^{12}\text{C}^{14}\text{N}$ | 3               | 2               | 104                       | 7               |

20

21

22
